# Supplementary material for: Understanding Collaboration with Virtual Assistants – The Role of Social Identity and the Extended Self
Source: Springer Nature journal article supplement (doi:10.1007/s12599-020-00672-x), 2020-12-01
Supplement: MOESM1 [file 18647888]

# **Understanding Collaboration with Virtual Assistants – The Role of Social Identity and the Extended Self**

**Milad Mirbabaie, Stefan Stieglitz, Felix Brünker, Lennart Hofeditz, Björn Ross, Nicholas Raphael Jonathan Frick**

Business & Information Systems Engineering (2021)

**Appendix (available online via <http://link.springer.com>)**

## Appendix

**Table A1** Factor Loadings of the main scales

| Factor            | Indicator       | Estimate | SE     | Z    | p      | Stand. Estimate |
|-------------------|-----------------|----------|--------|------|--------|-----------------|
| About Me          | About_Me_01     | 0.491    | 0.0835 | 5.87 | < .001 | 0.820           |
|                   | About_Me_02     | 0.681    | 0.1269 | 5.37 | < .001 | 0.756           |
|                   | About_Me_03     | 0.654    | 0.1587 | 4.12 | < .001 | 0.620           |
|                   | About_Me_04     | 0.442    | 0.1282 | 3.45 | < .001 | 0.530           |
| Modified About Me | Mod_About_Me_01 | 0.706    | 0.1230 | 5.74 | < .001 | 0.768           |
|                   | Mod_About_Me_02 | 0.669    | 0.1370 | 4.88 | < .001 | 0.675           |
|                   | Mod_About_Me_03 | 0.947    | 0.1382 | 6.85 | < .001 | 0.867           |
|                   | Mod_About_Me_04 | 0.592    | 0.1129 | 5.24 | < .001 | 0.711           |
| GES               | GES_01          | 0.746    | 0.1692 | 4.41 | < .001 | 0.635           |
|                   | GES_02          | 0.725    | 0.1912 | 3.79 | < .001 | 0.554           |
|                   | GES_03          | 0.851    | 0.1899 | 4.48 | < .001 | 0.632           |
|                   | GES_04          | 1.012    | 0.2064 | 4.90 | < .001 | 0.685           |
|                   | GES_05          | 1.412    | 0.2224 | 6.35 | < .001 | 0.824           |
|                   | GES_06          | 1.041    | 0.1824 | 5.70 | < .001 | 0.757           |
| AGES              | AGES_01         | 0.958    | 0.1798 | 5.33 | < .001 | 0.714           |
|                   | AGES_02         | 1.042    | 0.2007 | 5.19 | < .001 | 0.704           |
|                   | AGES_03         | 0.905    | 0.1316 | 6.88 | < .001 | 0.845           |
|                   | AGES_04         | 0.911    | 0.1663 | 5.48 | < .001 | 0.724           |
|                   | AGES_05         | 1.003    | 0.1718 | 5.84 | < .001 | 0.761           |
|                   | AGES_06         | 1.051    | 0.1654 | 6.36 | < .001 | 0.802           |

**Table A2** Correlation matrix of the items of the main scales

|                             | Abou<br>t_Me_<br>04 | Abou<br>t_Me_<br>03 | Abou<br>t_Me_<br>02 | Abou<br>t_Me_<br>01 | GES_<br>01   | GES_<br>02   | GES_<br>03   | GES_<br>04   | GES_<br>05   | GES_<br>06  | AGES<br>_01  | AGES<br>_02  | AGES<br>_03  | AGES<br>_04  | AGES<br>_05  | AGES<br>_06  | Mod<br>_Abo<br>ut_M<br>e_01 | Mod<br>_Abo<br>ut_M<br>e_02 | Mod<br>_Abo<br>ut_M<br>e_03 | Mod<br>_Abo<br>ut_Me<br>_04 |
|-----------------------------|---------------------|---------------------|---------------------|---------------------|--------------|--------------|--------------|--------------|--------------|-------------|--------------|--------------|--------------|--------------|--------------|--------------|-----------------------------|-----------------------------|-----------------------------|-----------------------------|
| Abou<br>t_Me_<br>04         | —                   |                     |                     |                     |              |              |              |              |              |             |              |              |              |              |              |              |                             |                             |                             |                             |
| Abou<br>t_Me_<br>03         | 0.485<br>***        | —                   |                     |                     |              |              |              |              |              |             |              |              |              |              |              |              |                             |                             |                             |                             |
| Abou<br>t_Me_<br>02         | 0.323<br>*          | 0.459<br>**         | —                   |                     |              |              |              |              |              |             |              |              |              |              |              |              |                             |                             |                             |                             |
| Abou<br>t_Me_<br>01         | 0.427<br>**         | 0.483<br>***        | 0.639<br>***        | —                   |              |              |              |              |              |             |              |              |              |              |              |              |                             |                             |                             |                             |
| GES_<br>01                  | 0.333               | -0.044              | 0.185               | 0.108               | —            |              |              |              |              |             |              |              |              |              |              |              |                             |                             |                             |                             |
| GES_<br>02                  | 0.210               | -0.057              | 0.225               | 0.203               | 0.509<br>*** | —            |              |              |              |             |              |              |              |              |              |              |                             |                             |                             |                             |
| GES_<br>03                  | -0.047              | -0.129              | 0.101               | 0.065               | 0.447<br>**  | 0.254        | —            |              |              |             |              |              |              |              |              |              |                             |                             |                             |                             |
| GES_<br>04                  | 0.167               | -0.109              | 0.062               | 0.128               | 0.595<br>*** | 0.316<br>*   | 0.480<br>*** | —            |              |             |              |              |              |              |              |              |                             |                             |                             |                             |
| GES_<br>05                  | -0.103              | -0.054              | 0.242               | 0.171               | 0.454<br>**  | 0.443<br>**  | 0.529<br>*** | 0.510<br>*** | —            |             |              |              |              |              |              |              |                             |                             |                             |                             |
| GES_<br>06                  | 0.021               | -0.126              | 0.216               | 0.167               | 0.438<br>**  | 0.377<br>**  | 0.484<br>*** | 0.517<br>*** | 0.667<br>*** | —           |              |              |              |              |              |              |                             |                             |                             |                             |
| AGES<br>_01                 | 0.100               | 0.009               | 0.203               | 0.117               | 0.076        | 0.510<br>*** | 0.219        | 0.146        | 0.276        | 0.293<br>*  | —            |              |              |              |              |              |                             |                             |                             |                             |
| AGES<br>_02                 | 0.103               | 0.006               | 0.207               | 0.311<br>*          | 0.144        | 0.570<br>*** | 0.206        | 0.345<br>*   | 0.376<br>*   | 0.398<br>** | 0.779<br>*** | —            |              |              |              |              |                             |                             |                             |                             |
| AGES<br>_03                 | 0.028               | 0.107               | 0.142               | 0.181               | 0.095        | 0.298<br>*   | 0.213        | 0.292        | 0.547<br>*** | 0.322<br>*  | 0.587<br>*** | 0.551<br>*** | —            |              |              |              |                             |                             |                             |                             |
| AGES<br>_04                 | -0.003              | -0.010              | -0.140              | -0.009              | 0.125        | 0.261        | 0.178        | 0.254<br>*   | 0.291<br>*   | 0.166       | 0.453<br>**  | 0.511<br>*** | 0.616<br>*** | —            |              |              |                             |                             |                             |                             |
| AGES<br>_05                 | 0.058               | 0.088               | 0.131               | 0.077               | 0.070        | 0.233        | 0.166        | 0.240        | 0.532<br>*** | 0.254<br>** | 0.444<br>**  | 0.344<br>**  | 0.695<br>*** | 0.614<br>*** | —            |              |                             |                             |                             |                             |
| AGES<br>_06                 | 0.099               | 0.154               | 0.268               | 0.108               | 0.191        | 0.358<br>*   | 0.176        | 0.250        | 0.451<br>**  | 0.242       | 0.582<br>*** | 0.548<br>*** | 0.667<br>*** | 0.540<br>*** | 0.692<br>*** | —            |                             |                             |                             |                             |
| Mod<br>_Abo<br>ut_M<br>e_01 | -0.157              | -0.008              | 0.099               | 0.067               | 0.141        | 0.346<br>*   | 0.358<br>*   | 0.158        | 0.446<br>**  | 0.358<br>*  | 0.366<br>*   | 0.387<br>**  | 0.525<br>*** | 0.436<br>**  | 0.439<br>**  | 0.447<br>**  | —                           |                             |                             |                             |
| Mod<br>_Abo<br>ut_M<br>e_02 | 0.063               | 0.120               | 0.022               | 0.109               | 0.084        | 0.463<br>**  | 0.203        | 0.146        | 0.186        | 0.070       | 0.285        | 0.334<br>*   | 0.336<br>*   | 0.481<br>*** | 0.389<br>**  | 0.505<br>*** | 0.461<br>**                 | —                           |                             |                             |
| Mod<br>_Abo<br>ut_M<br>e_03 | -0.012              | 0.088               | -0.005              | 0.090               | -0.017       | 0.260        | 0.213        | 0.295<br>*   | 0.201        | 0.127       | 0.338<br>*   | 0.406<br>**  | 0.460<br>**  | 0.541<br>*** | 0.355<br>*   | 0.345<br>*   | 0.647<br>***                | 0.629<br>***                | —                           |                             |
| Mod<br>_Abo<br>ut_M<br>e_04 | -0.217              | -0.262              | -0.062              | 0.009               | -0.111       | 0.209        | 0.086        | 0.133        | 0.180        | 0.074       | 0.211        | 0.355<br>*   | 0.314<br>*   | 0.480<br>*** | 0.338<br>*   | 0.240        | 0.583<br>***                | 0.411<br>**                 | 0.634<br>***                | —                           |

Note. \* p < .05, \*\* p < .01, \*\*\* p < .001
